# Supplementary material for: Opioids exacerbate inflammation in people with well-controlled HIV
Source: PubMed Central journal article supplement (PMC10646416; doi:10.3389/fimmu.2023.1277491), 2023-11-01
Supplement: Table_1.pdf [file Table_1.pdf]

| Surface Marker/Reagent            | Color        | Clone    | Company                      | Catalog #  |
|-----------------------------------|--------------|----------|------------------------------|------------|
| CD19                              | BUV395       | SJ25C1   | BD                           | 563549     |
| CD28                              | BV785        | CD28.2   | Biologend                    | 302950     |
| CD3                               | BV570        | UCHT1    | Biologend                    | 300436     |
| CD38                              | APC/Fire 810 | HIT2     | Biologend                    | 303550     |
| CD4                               | BUV805       | SK3      | BD                           | 612887     |
| CD45                              | Alexa 532    | HI30     | Life Technologies            | 58-0459-42 |
| CD57                              | BV421        | NK-1     | BD                           | 563896     |
| CD8                               | BB700        | RPA-T8   | BD                           | 566451/2   |
| CTLA-4                            | PE-Cy5       | BNI3     | BD                           | 561717     |
| HLA-DR                            | BUV661       | G46-6    | BD                           | 612980     |
| LAG-3                             | BV711        | 11C3C65  | Biologend                    | 369320     |
| PD-1                              | APC          | EH12.2H7 | Biologend                    | 329908     |
| TIGIT                             | Alexa 647    | A15153G  | Biologend                    | 372724     |
| TIM-3                             | APC-Cy7      | F38-2E2  | Biologend                    | 345026     |
| Benzonase                         |              |          | Millipore                    | 70664-3    |
| FcX Blocker                       |              |          | Biologend                    | 422302     |
| LIVE-DEAD Blue                    |              |          | Invitrogen                   | L23105     |
| Paraformaldehyde Aqueous Solution |              |          | Electron Microscopy Sciences | 15712-S    |
| UltraComp Compensation Beads      |              |          | ThermoFisher                 | 01-2222-41 |

**Supplemental Table 1. Panel of surface markers and reagents used in multiparameter flow cytometry.**
