# Supplementary material for: Opioids exacerbate inflammation in people with well-controlled HIV
Source: PubMed Central journal article supplement (PMC10646416; doi:10.3389/fimmu.2023.1277491), 2023-11-01
Supplement: Table_2.pdf [file Table_2.pdf]

| Significant Variables                | Comparison among groups   | HIV+OP+ vs HIV-OP+      | HIV+OP+ vs HIV+OP-      | HIV+OP+ vs HIV-OP-      | HIV-OP+ vs HIV+OP-      | HIV-OP+ vs HIV-OP-      | HIV+OP- vs HIV-OP-     |
|--------------------------------------|---------------------------|-------------------------|-------------------------|-------------------------|-------------------------|-------------------------|------------------------|
| <b>Demographics</b>                  |                           |                         |                         |                         |                         |                         |                        |
| Age                                  | p < 0.001 <sup>a</sup>    | NS                      | p < 0.01 <sup>a</sup>   | NS                      | p < 0.001 <sup>a</sup>  | p < 0.001 <sup>a</sup>  | NS                     |
| Gender                               | p < 0.05 <sup>b,†</sup>   | NS                      | NS                      | NS                      | p < 0.01 <sup>c</sup>   | p < 0.01 <sup>c</sup>   | NS                     |
| Race                                 | p < 0.0001 <sup>b,†</sup> | p < 0.0001 <sup>c</sup> | p < 0.0001 <sup>c</sup> | p < 0.0001 <sup>c</sup> | p < 0.0001 <sup>c</sup> | p < 0.0001 <sup>c</sup> | NS                     |
| HCV Ab seropositivity                | p < 0.0001 <sup>b,†</sup> | NS                      | p < 0.0001 <sup>c</sup> | p < 0.0001 <sup>c</sup> | p < 0.0001 <sup>c</sup> | p < 0.0001 <sup>c</sup> | NS                     |
| Baseline CD4 T-cell count (cells/uL) | p < 0.001 <sup>a</sup>    | NS                      | NS                      | NS                      | p < 0.05 <sup>a</sup>   | NS                      | p < 0.001 <sup>a</sup> |
| Baseline CD4/CD8 Ratio               | p < 0.001 <sup>a</sup>    | p < 0.001 <sup>a</sup>  | NS                      | p < 0.001 <sup>a</sup>  | p < 0.001 <sup>a</sup>  | NS                      | p < 0.001 <sup>a</sup> |
| <b>Substance Use</b>                 |                           |                         |                         |                         |                         |                         |                        |
| # of Substances Used                 | p < 0.001 <sup>a</sup>    | NS                      | p < 0.001 <sup>a</sup>  | p < 0.001 <sup>a</sup>  | p < 0.001 <sup>a</sup>  | p < 0.001 <sup>a</sup>  | NS                     |
| Injection Drug Use                   | p < 0.0001 <sup>b</sup>   | p < 0.05 <sup>c</sup>   | p < 0.05 <sup>c</sup>   | p < 0.01 <sup>c</sup>   | p < 0.0001 <sup>c</sup> | p < 0.0001 <sup>c</sup> | NS                     |
| Cocaine                              | p < 0.0001 <sup>b</sup>   | NS                      | NS                      | p < 0.01 <sup>c</sup>   | p < 0.01 <sup>c</sup>   | p < 0.0001 <sup>c</sup> | NS                     |
| Benzodiazepine                       | p < 0.01 <sup>b</sup>     | NS                      | p < 0.01 <sup>c</sup>   | p < 0.05 <sup>c</sup>   | NS                      | NS                      | NS                     |
| Ethyl-Glucuronide                    | p < 0.05 <sup>b</sup>     | NS                      | NS                      | p < 0.01 <sup>c</sup>   | p < 0.05 <sup>c</sup>   | p < 0.05 <sup>c</sup>   | NS                     |

<sup>a</sup> Kruskal-Wallis; <sup>b</sup> Chi-Square; <sup>c</sup> Fisher's Exact Test; NA=Not Applicable; NS=Not Significant

† = Participant removal due to small cell size (Gender (n=3), Race (n=13), HCV (n=1))

**Supplemental Table 2. Multiple group comparisons of significant variables in cohort demographics and participant clinical profile, baseline urine drug screen (UDS)**
